# Supplementary material for: Maternal Health Care Services Utilization in the Post-conflict Democratic Republic of Congo: Analysis of Health Inequalities over Time
Source: Preprints.org preprint supplement (doi:10.20944/preprints202308.1768.v1), 2023-08-25

## Additional file S3 Lorenz Curves for all selected maternal health care services utilization variables

### Ever birth by C-section

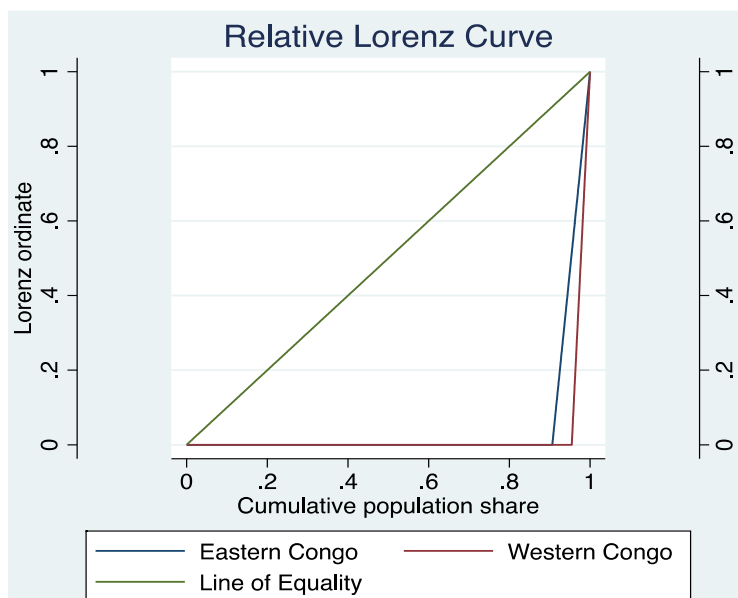

### Last birth C-section

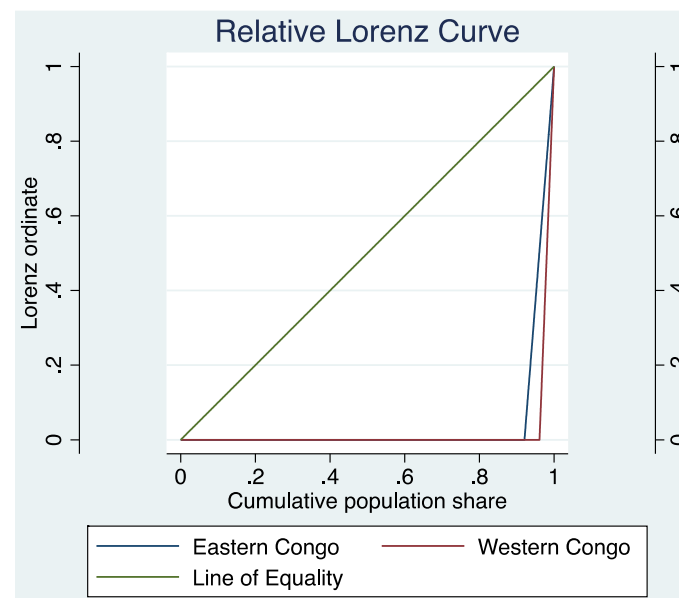

## Prenatal Check Number

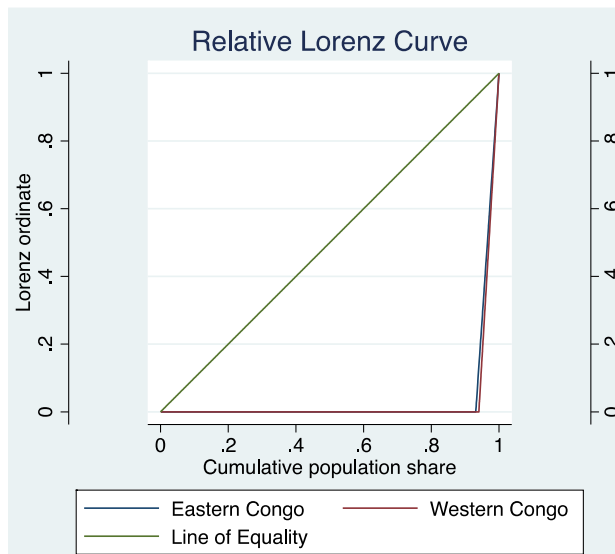

## Prenatal check weighed

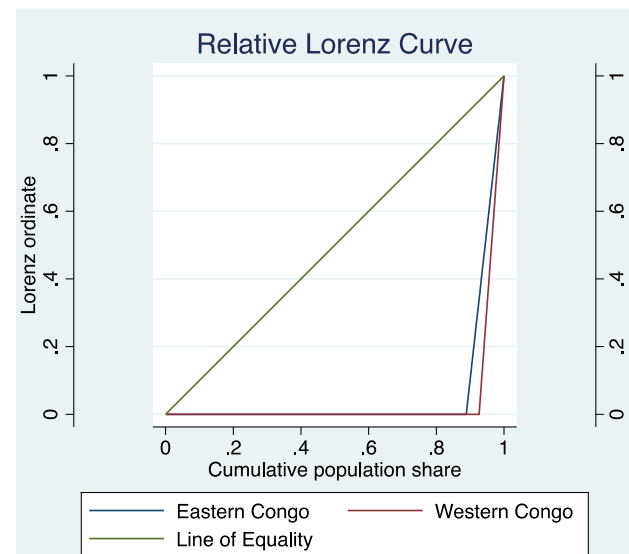

## Prenatal check height

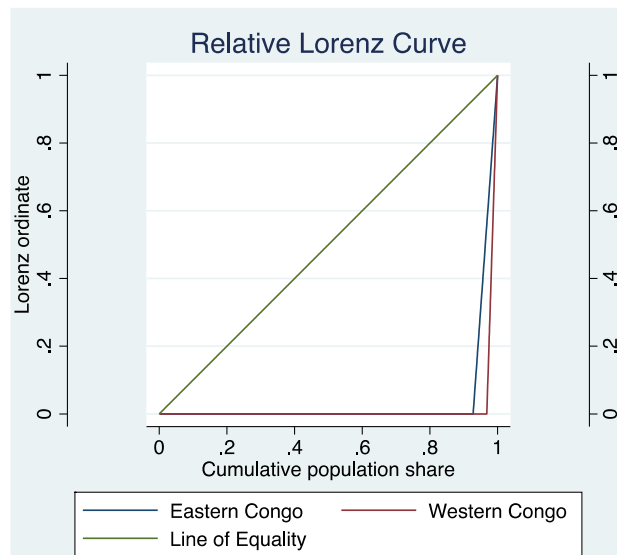

## Prenatal check of blood pressure

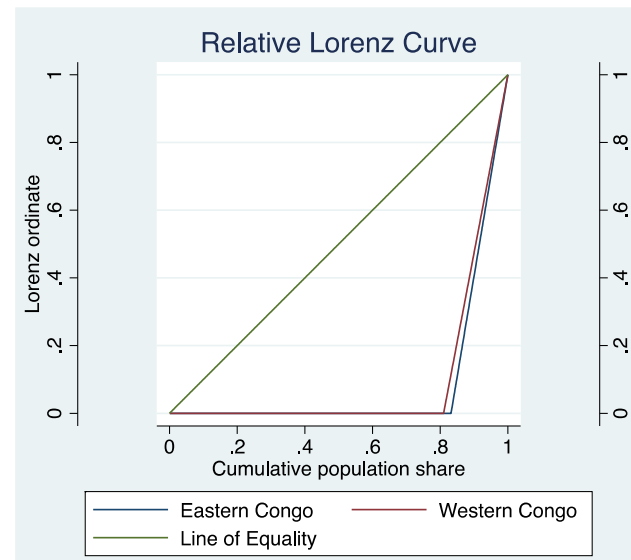

## Prenatal check urine sample

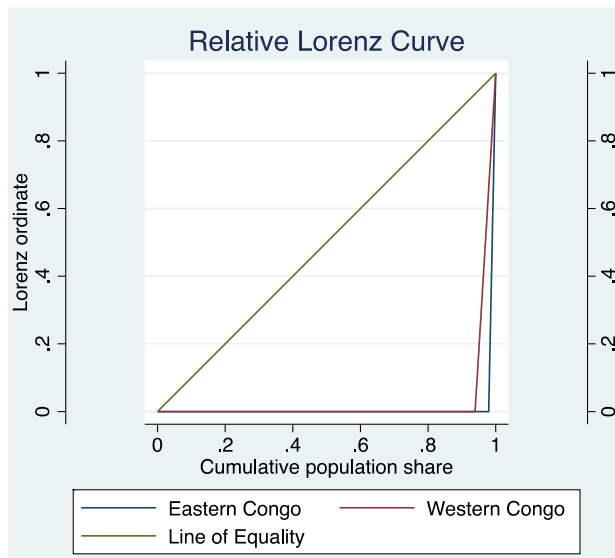

## Prenatal check blood sample

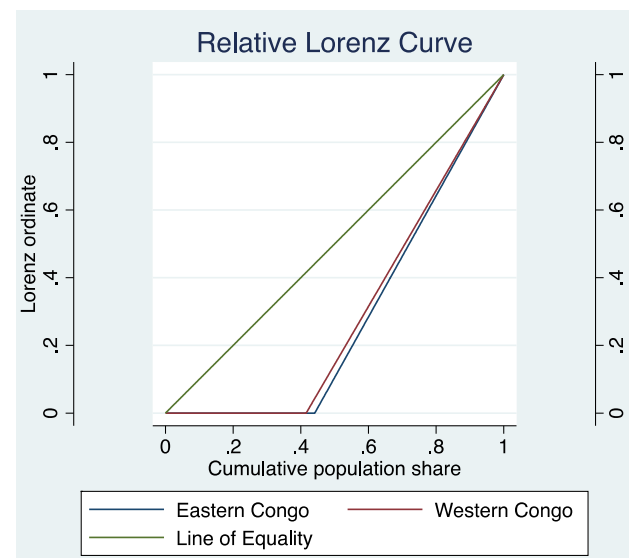

## Tetanus injections

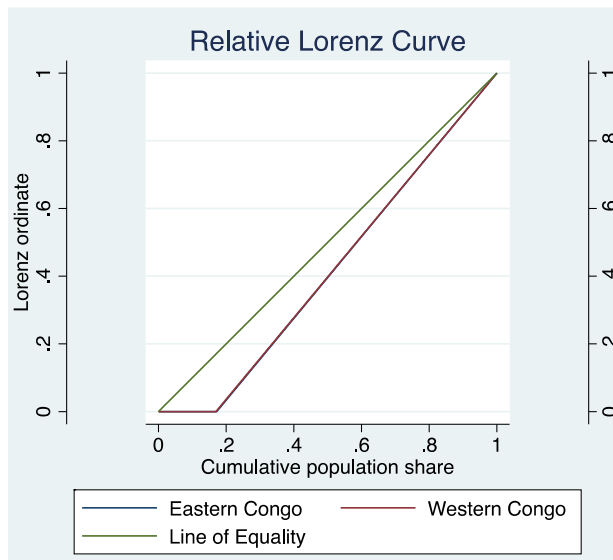

## Received pregnancy information

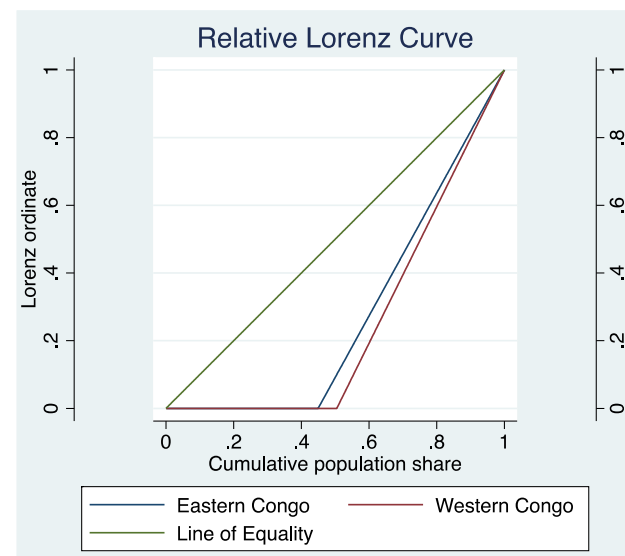

## Received postnatal checkup

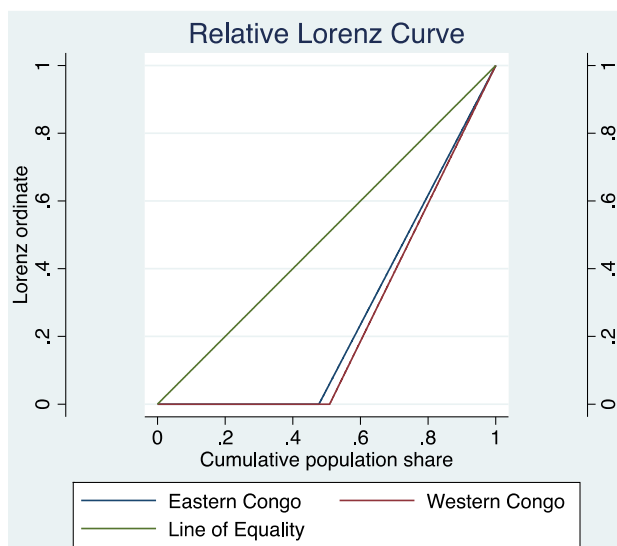

## Visited health facilities last 12 months

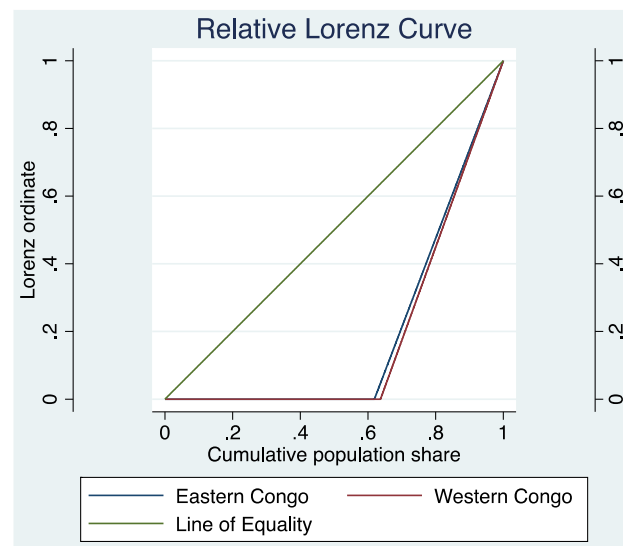

## Number of antenatal visits

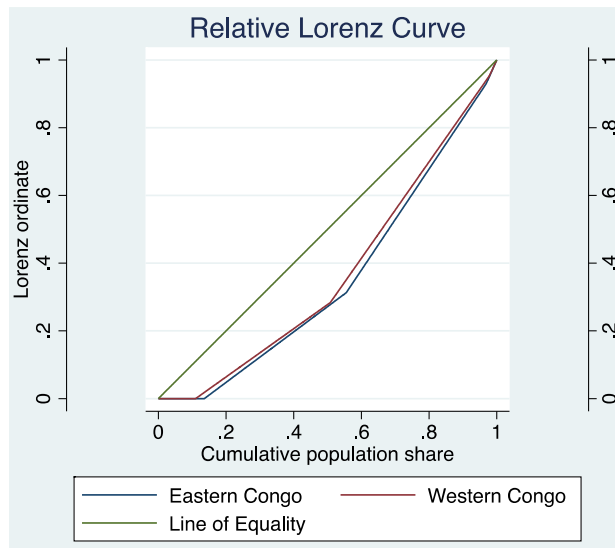

## Prenatal care received

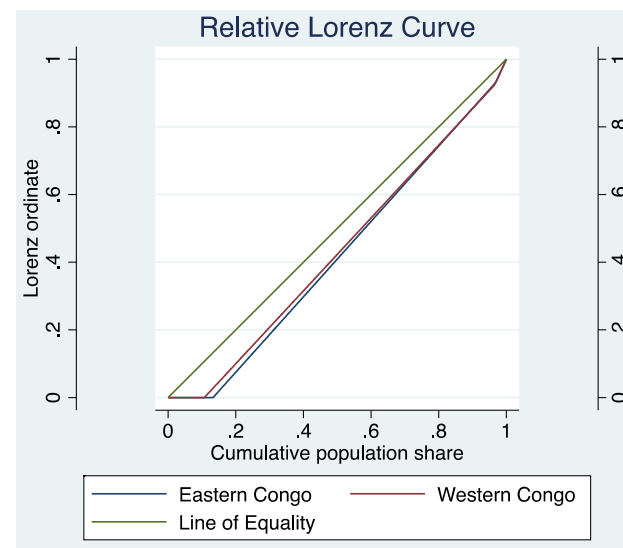

Assistance during delivery

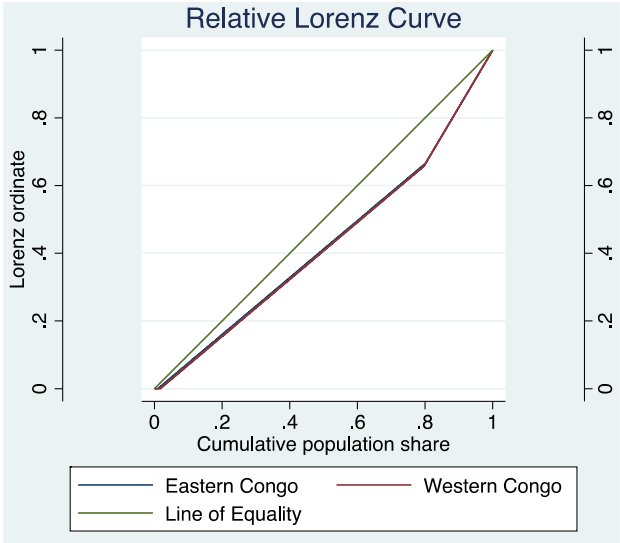

Supplement: Supplementary file 5 [file supplementary]
