# Supplementary material for: Maternal Health Care Services Utilization in the Post-conflict Democratic Republic of Congo: Analysis of Health Inequalities over Time
Source: Preprints.org preprint supplement (doi:10.20944/preprints202308.1768.v1), 2023-08-25
Supplement: Supplementary file 1 [file supplementary]

| Table 3. Relative Risk Ratio on categorical variables - Mu                           |                         |                             |                              |                                 |                            |                              |                                   |
|--------------------------------------------------------------------------------------|-------------------------|-----------------------------|------------------------------|---------------------------------|----------------------------|------------------------------|-----------------------------------|
| Variables                                                                            | Number Antenatal visits |                             |                              |                                 | Prenatalcare received from |                              |                                   |
|                                                                                      | No visits               | 1-3 visits                  | 4-7 visits                   | 8 or more visits                | Base = no one              | Professional care            | Traditional care                  |
|                                                                                      | Relative Risk Ratio     | Relative Risk Ratio         | Relative Risk Ratio          | Relative Risk Ratio             | Relative Risk Ratio        | Relative Risk Ratio          | Relative Risk Ratio               |
| <b>Base = Eastern Congo</b>                                                          |                         |                             |                              |                                 |                            |                              |                                   |
| Western Congo                                                                        |                         | 1.577<br>(0.953 - 2.609)    | 2.372***<br>(1.406 - 4.002)  | 1290<br>(0.381 - 4.372)         |                            | 1.746**<br>(1.099 - 2.775)   | 5.205***<br>(2.124 - 12.76)       |
| <b>Base = 2013-2014</b>                                                              |                         |                             |                              |                                 |                            |                              |                                   |
| 2007                                                                                 |                         | 0.734<br>(0.497 - 1.082)    | 0.711<br>(0.475 - 1.064)     | 1,010<br>(0.427 - 2.389)        |                            | 0.784<br>(0.543 - 1.133)     | 0.565<br>(0.257 - 1.240)          |
| <b>Base = Catholic</b>                                                               |                         |                             |                              |                                 |                            |                              |                                   |
| Protestant                                                                           |                         | 0.919<br>(0.566 - 1.494)    | 0.926<br>(0.565 - 1.518)     | 0.422<br>(0.139 - 1.280)        |                            | 0.839<br>(0.525 - 1.341)     | 1,156<br>(0.432 - 3.092)          |
| Kimbanguist                                                                          |                         | 0.707<br>(0.304 - 1.647)    | 0.437<br>(0.181 - 1.055)     | 0.185<br>(0.0246 - 1.387)       |                            | 0.519<br>(0.233 - 1.156)     | 0.427<br>(0.0809 - 2.254)         |
| Other Christians                                                                     |                         | 0.876<br>(0.544 - 1.410)    | 0.882<br>(0.543 - 1.432)     | 0.604<br>(0.209 - 1.747)        |                            | 0.870<br>(0.551 - 1.373)     | 0.662<br>(0.256 - 1.710)          |
| Muslim                                                                               |                         | 0.396<br>(0.107 - 1.457)    | 0.454<br>(0.115 - 1.794)     | 0***<br>(0 - 0)                 |                            | 0.290**<br>(0.0859 - 0.979)  | 4,015<br>(0.612 - 26.34)          |
| Animist                                                                              |                         | 0.347<br>(0.0394 - 3.060)   | 1,441<br>(0.111 - 18.79)     | 0***<br>(0 - 0)                 |                            | 0.714<br>(0.0851 - 5.982)    | 0.730<br>(0.0373 - 14.27)         |
| No religion                                                                          |                         | 0.240**<br>(0.0779 - 0.737) | 0.263**<br>(0.0841 - 0.824)  | 0.0250***<br>(0.00236 - 0.265)  |                            | 0.233***<br>(0.0894 - 0.607) | 0***<br>(0 - 0)                   |
| Other                                                                                |                         | 0.700<br>(0.265 - 1.850)    | 0.158***<br>(0.0422 - 0.592) | 0***<br>(0 - 0)                 |                            | 0.348**<br>(0.132 - 0.918)   | 1,477<br>(0.284 - 7.694)          |
| <b>Base = Bakongo north and South</b>                                                |                         |                             |                              |                                 |                            |                              |                                   |
| Bas-Kasai and Kwilu-Kwngo                                                            |                         | 0.916<br>(0.335 - 2.504)    | 1097<br>(0.395 - 3.047)      | 0.813<br>(0.0694 - 9.514)       |                            | 1,034<br>(0.385 - 2.772)     | 3,614<br>(0.552 - 23.68)          |
| Cuvette Central                                                                      |                         | 0.313**<br>(0.116 - 0.847)  | 0.819<br>(0.301 - 2.228)     | 9.33<br>(0.862 - 100.9)         |                            | 0.568<br>(0.222 - 1.455)     | 3,118<br>(0.519 - 18.72)          |
| Ubangi and Itimbiri                                                                  |                         | 0.553<br>(0.204 - 1.495)    | 0.789<br>(0.287 - 2.169)     | 4,036<br>(0.375 - 43.48)        |                            | 0.668<br>(0.256 - 1.741)     | 1,078<br>(0.133 - 8.756)          |
| Uele Lake Albert                                                                     |                         | 0.861<br>(0.258 - 2.873)    | 1,631<br>(0.462 - 5.750)     | 3,714<br>(0.245 - 56.40)        |                            | 1,083<br>(0.342 - 3.431)     | 17.07**<br>(1.890 - 154.1)        |
| Basele-k, man. And Kivu                                                              |                         | 2,387<br>(0.775 - 7.352)    | 4,415**<br>(1.378 - 14.15)   | 8997<br>(0.650 - 124.5)         |                            | 3.028**<br>(1.024 - 8.952)   | 13.41**<br>(1.595 - 112.7)        |
| Kasai, Katanga, Tanganika                                                            |                         | 0.483<br>(0.194 - 1.202)    | 0.618<br>(0.243 - 1.574)     | 4430<br>(0.475 - 41.29)         |                            | 0.560<br>(0.231 - 1.354)     | 1,912<br>(0.319 - 11.44)          |
| Lunda                                                                                |                         | 1,000<br>(0.210 - 4.757)    | 2222<br>(0.473 - 10.43)      | 33.47**<br>(1.741 - 643.4)      |                            | 1,602<br>(0.382 - 6.718)     | 0***<br>(0 - 1.07e-10)            |
| Other                                                                                |                         | 0.531<br>(0.0966 - 2.921)   | 0.741<br>(0.114 - 4.812)     | 0***<br>(0 - 0)                 |                            | 0.572<br>(0.110 - 2.984)     | 4,955<br>(0.247 - 99.41)          |
| <b>Base = Urban</b>                                                                  |                         |                             |                              |                                 |                            |                              |                                   |
| Rural                                                                                |                         | 0.719<br>(0.404 - 1.281)    | 0.690<br>(0.390 - 1.222)     | 3.636**<br>(1.207 - 10.95)      |                            | 0.726<br>(0.425 - 1.242)     | 2.576<br>(0.976 - 6.798)          |
| <b>Base = Poorest</b>                                                                |                         |                             |                              |                                 |                            |                              |                                   |
| Poorer                                                                               |                         | 0.941<br>(0.608 - 1.457)    | 1300<br>(0.829 - 2.037)      | 1851<br>(0.646 - 5.303)         |                            | 1,169<br>(0.777 - 1.760)     | 0.769<br>(0.340 - 1.741)          |
| Middle                                                                               |                         | 1.699**<br>(1.046 - 2.761)  | 1.928**<br>(1.158 - 3.210)   | 2317<br>(0.747 - 7.193)         |                            | 1.959***<br>(1.231 - 3.116)  | 0.387<br>(0.144 - 1.040)          |
| Richer                                                                               |                         | 1342<br>(0.753 - 2.395)     | 1.928**<br>(1.075 - 3.458)   | 0.825<br>(0.142 - 4.795)        |                            | 1.585<br>(0.932 - 2.695)     | 1,365<br>(0.509 - 3.657)          |
| Richest                                                                              |                         | 0.684<br>(0.233 - 2.010)    | 1970<br>(0.683 - 5.682)      | 7.077**<br>(1.225 - 40.90)      |                            | 1,257<br>(0.455 - 3.478)     | 2,451<br>(0.492 - 12.22)          |
| <b>Base = no - currently not working</b>                                             |                         |                             |                              |                                 |                            |                              |                                   |
| Yes - currently working                                                              |                         | 1029<br>(0.677 - 1.565)     | 1129<br>(0.747 - 1.705)      | 0.571<br>(0.221 - 1.477)        |                            | 1,060<br>(0.719 - 1.562)     | 1,749<br>(0.802 - 3.814)          |
| <b>Base = no education</b>                                                           |                         |                             |                              |                                 |                            |                              |                                   |
| Primary education level                                                              |                         | 1.481<br>(0.995 - 2.205)    | 1.752***<br>(1.149 - 2.671)  | 1594<br>(0.604 - 4.209)         |                            | 1.512**<br>(1.037 - 2.204)   | 3.554***<br>(1.567 - 8.061)       |
| Secondary education level                                                            |                         | 3.285***<br>(1.769 - 6.100) | 5.633***<br>(3.039 - 10.44)  | 3.828**<br>(1.152 - 12.72)      |                            | 4.497***<br>(2.476 - 8.165)  | 4.643***<br>(1.647 - 13.09)       |
| Higher education level                                                               |                         | 2674<br>(0.234 - 30.59)     | 3784<br>(0.416 - 34.44)      | 32.45**<br>(1.435 - 733.6)      |                            | 3,646<br>(0.411 - 32.35)     | 0***<br>(0 - 0)                   |
| Constant                                                                             |                         | 3.441*<br>(0.919 - 12.88)   | 1081<br>(0.277 - 4.222)      | 0.0111***<br>(0.000571 - 0.215) |                            | 4.264**<br>(1.228 - 14.81)   | 0.00446***<br>(0.000293 - 0.0677) |
| Observations                                                                         | 2.537                   | 2.537                       | 2.537                        | 2.537                           | 2.568                      | 2.568                        | 2.568                             |
| Notes_Titles                                                                         |                         |                             |                              |                                 |                            |                              |                                   |
| Relative risk measures the association between the exposure and the outcome.         |                         |                             |                              |                                 |                            |                              |                                   |
| Robust ci in parentheses (Figures in brackets show 95 percent confidence intervals). |                         |                             |                              |                                 |                            |                              |                                   |
| *** p<0.01, ** p<0.05                                                                |                         |                             |                              |                                 |                            |                              |                                   |
