# Supplementary material for: Maternal Health Care Services Utilization in the Post-conflict Democratic Republic of Congo: Analysis of Health Inequalities over Time
Source: Preprints.org preprint supplement (doi:10.20944/preprints202308.1768.v1), 2023-08-25
Supplement: Supplementary file 2 [file supplementary]

| Table 4. Gini coefficients for all selected maternal health variables |             |      |         |             |      |         |
|-----------------------------------------------------------------------|-------------|------|---------|-------------|------|---------|
|                                                                       | Eastern DRC |      |         | Western DRC |      |         |
| All selected Variables                                                | Overall     | 2007 | 2013/14 | Overall     | 2007 | 2013/14 |
| <b>Cesarean-section</b>                                               |             |      |         |             |      |         |
| Ever birth C-section                                                  | 0.91        | 0.94 | 0.90    | 0.96        | 0.96 | 0.96    |
| Last birth C-section                                                  | 0.93        | 0.95 | 0.92    | 0.97        | 0.96 | 0.97    |
| <b>Prenatal care</b>                                                  |             |      |         |             |      |         |
| Prenatal check_no                                                     | 0.94        | 0.93 | 0.94    | 0.95        | 0.95 | 0.95    |
| Received prenatal care                                                | 0.17        | 0.24 | 0.13    | 0.15        | 0.14 | 0.15    |
| Prenatal check weighed                                                | 0.89        | 0.88 | 0.88    | 0.93        | 0.92 | 0.94    |
| Prenatal check height                                                 | 0.93        | 0.97 | 0.91    | 0.97        | 0.97 | 0.98    |
| Prenatal check blood pressure                                         | 0.84        | 0.83 | 0.84    | 0.82        | 0.82 | 0.81    |
| Prenatal check urine sample                                           | 0.98        | 0.97 | 0.99    | 0.94        | 0.95 | 0.94    |
| Prenatal check blood sample                                           | 0.45        | 0.45 | 0.45    | 0.42        | 0.42 | 0.42    |
| Tetanus injections                                                    | 0.18        | 0.24 | 0.15    | 0.17        | 0.19 | 0.17    |
| Received pregnancy information                                        | 0.45        | 0.61 | 0.39    | 0.51        | 0.67 | 0.43    |
| <b>Postnatal Care</b>                                                 |             |      |         |             |      |         |
| Received postnatal checkup                                            | 0.48        | 0.04 | 0.49    | 0.51        | 0.13 | 0.52    |
| Visited health facilities last 12 months                              | 0.62        | 0.66 | 0.61    | 0.64        | 0.67 | 0.62    |
| Assistance during delivery                                            | 0.15        | 0.17 | 0.14    | 0.16        | 0.17 | 0.15    |
