# Supplementary material for: Maternal Health Care Services Utilization in the Post-conflict Democratic Republic of Congo: Analysis of Health Inequalities over Time
Source: Preprints.org preprint supplement (doi:10.20944/preprints202308.1768.v1), 2023-08-25
Supplement: Supplementary file 3 [file supplementary]

**Additional file S2. Description of selected variables**

| <b><i>Dependent Variables</i></b>   | <b><i>Description of variables</i></b>                                                                                                                                                                                                                                    | <b><i>Source</i></b>                      |
|-------------------------------------|---------------------------------------------------------------------------------------------------------------------------------------------------------------------------------------------------------------------------------------------------------------------------|-------------------------------------------|
| C-section                           | Percentage of live births delivered by cesarean section                                                                                                                                                                                                                   | STAT compiler (DHS)                       |
| Prenatal care                       | The proportion of women aged 15-49 who have attended at least four antenatal care visits for their most recent pregnancy in the five years before the survey (= Last birth during the past 5 years)                                                                       | STAT compiler (DHS)                       |
| Delivery care                       | The proportion of women aged 15-49 for whom the most recent birth in the five years before the survey was delivered in a health facility. Health facilities could be government, private, NGO (non-governmental organization), or another type such as a maternity clinic | STAT compiler (DHS)                       |
| Postnatal care                      | Last birth during the past 5 years                                                                                                                                                                                                                                        | STAT compiler (DHS)                       |
| <b><i>Independent Variables</i></b> | <b><i>Description of variables</i></b>                                                                                                                                                                                                                                    | <b><i>Source</i></b>                      |
| Survey Period                       |                                                                                                                                                                                                                                                                           |                                           |
| 2007                                | First survey wave – 2007                                                                                                                                                                                                                                                  | STAT compiler (DHS)                       |
| 2013/2014                           | Second survey wave – 2013/2014                                                                                                                                                                                                                                            | STAT compiler (DHS)                       |
| Geographic Regions                  |                                                                                                                                                                                                                                                                           |                                           |
| Eastern Congo                       | Is centered on the North and South Kivu Provinces, as well as nearby Orientale, Maniema, and Katanga                                                                                                                                                                      | STAT compiler (DHS)                       |
| Western Congo                       | Includes the capital city (Kinshasa) and the provinces of Bandundu, Bas-Congo, Equateur, Kasai Oriental, and Kasai Occidental                                                                                                                                             | STAT compiler (DHS)                       |
| <b><i>Control Variables</i></b>     | <b><i>Description of variables</i></b>                                                                                                                                                                                                                                    | <b><i>Source</i></b>                      |
| Place of residence                  |                                                                                                                                                                                                                                                                           |                                           |
| Urban                               | Share of population living in urban areas, as defined by national statistical offices                                                                                                                                                                                     | World Development Indicators (World Bank) |

|                                  |                                                                                                                                                                                                                                                                                                                                                       |                                           |
|----------------------------------|-------------------------------------------------------------------------------------------------------------------------------------------------------------------------------------------------------------------------------------------------------------------------------------------------------------------------------------------------------|-------------------------------------------|
| Rural                            | Share of population living in rural areas, as defined by national statistical offices                                                                                                                                                                                                                                                                 | World Development Indicators (World Bank) |
| Highest education level          | Gross secondary school enrollment as a share of the secondary school-aged population                                                                                                                                                                                                                                                                  | World Development Indicators (World Bank) |
| Religion                         | Religious identification was based on the answer to a single question "What is your religion?". Various categories of answers were pre-coded in the interview questionnaire based on local knowledge:<br>1 = Catholic; 2 = Protestant; 3 = Salvation army; 4 = Kimbanguist; 5 = other Christian; 6 = Muslim; 7 = Animist; 8 = no religion; 96 = other | STAT compiler (DHS)                       |
| Ethnicity                        | Ethnicity was dichotomized into 1 = Bakongo north and south; 2 = Bas-Kasai and Kwilu-kwango; 3 = Cuvette centrale; 4 = Ubangi and Itimbiri; 5 = Uele lake Albert; 6 = Basele-kivu, Maniema and Kivu; 7 = Kasai, Katanga, Tanganika; 8 = Lunda; 9 = Pygmy; 96 = others                                                                                 | STAT compiler (DHS)                       |
| Wealth index                     | The difference in prevalence for each indicator between the richest (or highest) wealth quintile (q5) and poorest (or lowest) wealth quintile (q1).                                                                                                                                                                                                   | STAT compiler (DHS)                       |
| Respondent's current work status | Percent distribution of women and men aged 15-49 employed in the 12 months preceding the survey by occupation (= Percent distribution of women and men by employment status)                                                                                                                                                                          | STAT compiler (DHS)                       |

\*The STAT compiler is a tool that allows users to build custom tables, charts, and maps from thousands of indicators across 90 countries. It is meant to help users compare DHS data across countries and across time.
