# Supplementary material for: Maternal Health Care Services Utilization in the Post-conflict Democratic Republic of Congo: Analysis of Health Inequalities over Time
Source: Preprints.org preprint supplement (doi:10.20944/preprints202308.1768.v1), 2023-08-25
Supplement: Supplementary file 4 [file supplementary]

Table 1. Descriptive characteristics of all respondents in the DRC by selected variables

| Variables                      | Overall | 2007 DHS<br>( N=14.752) |
|--------------------------------|---------|-------------------------|
|                                | (%)     | (%)                     |
| <b>Place of residence</b>      |         |                         |
| Urban                          | 40.3    | 47.91                   |
| Rural                          | 59.7    | 52.09                   |
| <b>Highest Education level</b> |         |                         |
| No education                   | 18.96   | 21.08                   |
| Primary                        | 38.51   | 37.8                    |
| Secondary                      | 39.58   | 38.21                   |
| Higher                         | 2.96    | 2.91                    |
| <b>Region</b>                  |         |                         |
| Kinshasa                       | 12.04   | 16.67                   |
| Bandundu                       | 11.85   | 9.42                    |
| Bas-congo                      | 5.81    | 7.3                     |
| Equateur                       | 12.5    | 9.07                    |
| Kasai Occidental               | 7.59    | 7.27                    |
| Kasai Oriental                 | 10.2    | 8.66                    |
| Katanga                        | 10.83   | 9.25                    |
| Maniema                        | 5.93    | 8.54                    |
| Nord-Kivu                      | 6.84    | 8.16                    |
| Orientale                      | 10.03   | 7.55                    |
| Sud-Kivu                       | 6.38    | 8.07                    |
| <b>Wealth Index</b>            |         |                         |
| Poorest                        | 21.75   | 19.03                   |
| Poorer                         | 19.09   | 17.64                   |
| Middle                         | 19.05   | 18.38                   |
| Richer                         | 18.76   | 20.17                   |
| Richest                        | 21.35   | 24.78                   |
| <b>Religion</b>                |         |                         |
| Catholic                       | 29.14   | 29.67                   |
| Protestant                     | 28.84   | 30.7                    |
| Salvation army                 | 0.24    | 0.36                    |
| Kimbanguist                    | 3.07    | 3.23                    |
| Other christian                | 34.74   | 32.33                   |
| Muslim                         | 1.69    | 1.96                    |
| Animist                        | 0.42    | 0.52                    |
| No religion                    | 0.92    | 1.02                    |
| Bundu dia kongo                | 0.08    |                         |
| Vuvamu                         | 0.02    |                         |
| Other                          | 0.65    | 0.13                    |
| .                              | 0.19    | 0.08                    |
| <b>Ethnicity</b>               |         |                         |
| Bakongo north and south        | 10.29   | 13.69                   |
| Bas-kasai and kwilu-kwango     | 14.86   | 12.94                   |

|                           |       |       |
|---------------------------|-------|-------|
| Cuvette centrale          | 9.1   | 8.23  |
| Ubangi and itimbiri       | 9.81  | 6.29  |
| Uele lake albert          | 7.34  | 4.85  |
| Basele-k, man. and kivu   | 19.75 | 25.12 |
| Kasai, katanga, tanganika | 26.88 | 26.76 |
| Lunda                     | 1.01  | 0.98  |
| Pygmy                     | 0.22  | 0.09  |
| Foreign/Non-congolese     | 0.32  |       |
| Others                    | 0.25  | 0.71  |
| .                         | 0.16  | 0.33  |
| <b>Currently working</b>  |       |       |
| No                        | 33.76 | 38    |
| Yes                       | 65.99 | 61.93 |
| .                         | 0.25  | 0.07  |
| <b>Marital Status</b>     |       |       |
| Never married             | 24.36 | 24.76 |
| Married                   | 51.54 | 56.03 |
| Living together           | 14.5  | 9.86  |
| Widowed                   | 2.26  | 2.11  |
| Divorced                  | 1.94  | 1.72  |
| Not living together       | 5.4   | 5.51  |

*Data are presented as N and percentage*

| les and by survey wave     |
|----------------------------|
| 2013-14 DHS<br>(N=27.483 ) |
| (%)                        |
|                            |
| 36.26                      |
| 63.74                      |
|                            |
| 17.83                      |
| 38.88                      |
| 40.31                      |
| 2.98                       |
|                            |
| 9.58                       |
| 13.14                      |
| 5.02                       |
| 14.32                      |
| 7.76                       |
| 11.01                      |
| 11.66                      |
| 4.54                       |
| 6.13                       |
| 11.35                      |
| 5.49                       |
|                            |
| 23.19                      |
| 19.87                      |
| 19.41                      |
| 18.01                      |
| 19.53                      |
|                            |
| 28.86                      |
| 27.85                      |
| 0.18                       |
| 2.99                       |
| 36.02                      |
| 1.54                       |
| 0.37                       |
| 0.87                       |
| 0.12                       |
| 0.03                       |
| 0.93                       |
| 0.25                       |
|                            |
| 8.49                       |
| 15.88                      |

|       |
|-------|
| 9.56  |
| 11.68 |
| 8.66  |
| 16.9  |
| 26.95 |
| 1.03  |
| 0.29  |
| 0.49  |
| 0.01  |
| 0.07  |
|       |
| 31.51 |
| 68.15 |
| 0.35  |
|       |
| 24.14 |
| 49.15 |
| 16.96 |
| 2.34  |
| 2.06  |
| 5.34  |
