# Supplementary material for: Maternal Health Care Services Utilization in the Post-conflict Democratic Republic of Congo: Analysis of Health Inequalities over Time
Source: Preprints.org preprint supplement (doi:10.20944/preprints202308.1768.v1), 2023-08-25
Supplement: Supplementary file 7 [file supplementary]

| Table 5. Concentration indices by maternal health variables, by Survey year 2007 and 2013-2014, and by regions Western-Eastern Congo |                               |                               |                                                       |                                                                                                |                               |                               |                                                       |                                                                                                |               |                                    |                              |                                                 |               |                                   |                              |                                              |
|--------------------------------------------------------------------------------------------------------------------------------------|-------------------------------|-------------------------------|-------------------------------------------------------|------------------------------------------------------------------------------------------------|-------------------------------|-------------------------------|-------------------------------------------------------|------------------------------------------------------------------------------------------------|---------------|------------------------------------|------------------------------|-------------------------------------------------|---------------|-----------------------------------|------------------------------|----------------------------------------------|
| All selected Variables                                                                                                               | 2007                          |                               |                                                       |                                                                                                | 2013/14                       |                               |                                                       |                                                                                                | Western Congo |                                    |                              |                                                 | Eastern Congo |                                   |                              |                                              |
|                                                                                                                                      | Group 0<br>= Eastern<br>Congo | Group 1<br>= Western<br>Congo | Socioeconomic<br>inequality in the<br>health variable | Statistically<br>significance<br>between the 2<br>groups in the<br>socioeconomic<br>inequality | Group 0<br>= Eastern<br>Congo | Group 1<br>= Western<br>Congo | Socioeconomic<br>inequality in the<br>health variable | Statistically<br>significance<br>between the 2<br>groups in the<br>socioeconomic<br>inequality | CI            | PeriodSurvey<br>= 0<br>(2013/2014) | PeriodSurvey<br>=1<br>(2007) | Test for<br>Stat.<br>Significant<br>Differences | CI            | PeriodSurvey<br>=0<br>(2013/2014) | PeriodSurvey<br>=1<br>(2007) | Test for Stat.<br>Significant<br>Differences |
| <b>Delivery</b>                                                                                                                      |                               |                               |                                                       |                                                                                                |                               |                               |                                                       |                                                                                                |               |                                    |                              |                                                 |               |                                   |                              |                                              |
| Ever C-section                                                                                                                       | 0.67                          | 0.68                          | 0.68                                                  | 0.97                                                                                           | 0.65                          | 0.68                          | 0.67                                                  | 0.89                                                                                           | 0.68          | 0.68                               | 0.68                         | 0.97                                            | 0.65          | 0.65                              | 0.67                         | 0.97                                         |
| Last birth C-section                                                                                                                 | 0.68                          | 0.69                          | 0.68                                                  | 1.00                                                                                           | 0.66                          | 0.69                          | 0.68                                                  | 0.82                                                                                           | 0.69          | 0.69                               | 0.69                         | 0.94                                            | 0.66          | 0.66                              | 0.68                         | 0.87                                         |
| <b>Prenatal care</b>                                                                                                                 |                               |                               |                                                       |                                                                                                |                               |                               |                                                       |                                                                                                |               |                                    |                              |                                                 |               |                                   |                              |                                              |
| Prenatal care received                                                                                                               | 0.47                          | 0.85                          | 0.63                                                  | 0.47                                                                                           | 0.53                          | 0.67                          | 0.59                                                  | 0.75                                                                                           | 0.73          | 0.67                               | 0.85                         | 0.80                                            | 0.52          | 0.53                              | 0.47                         | 0.83                                         |
| Prenatal check number                                                                                                                | 0.67                          | 0.68                          | 0.68                                                  | 0.97                                                                                           | 0.68                          | 0.68                          | 0.68                                                  | 0.92                                                                                           | 0.68          | 0.68                               | 0.68                         | 0.87                                            | 0.67          | 0.68                              | 0.67                         | 0.91                                         |
| Prenatal check weighed                                                                                                               | 0.64                          | 0.67                          | 0.66                                                  | 0.90                                                                                           | 0.65                          | 0.67                          | 0.67                                                  | 0.82                                                                                           | 0.67          | 0.67                               | 0.67                         | 0.88                                            | 0.65          | 0.65                              | 0.64                         | 0.95                                         |
| Prenatal check height                                                                                                                | 0.69                          | 0.69                          | 0.69                                                  | 0.98                                                                                           | 0.66                          | 0.69                          | 0.68                                                  | 0.54                                                                                           | 0.69          | 0.69                               | 0.69                         | 0.93                                            | 0.67          | 0.66                              | 0.69                         | 0.55                                         |
| Prenatal check blood pressure                                                                                                        | 0.59                          | 0.59                          | 0.59                                                  | 0.71                                                                                           | 0.61                          | 0.58                          | 0.59                                                  | 0.90                                                                                           | 0.58          | 0.58                               | 0.59                         | 0.86                                            | 0.60          | 0.61                              | 0.59                         | 0.74                                         |
| Prenatal check urine sample                                                                                                          | 0.69                          | 0.68                          | 0.69                                                  | 0.53                                                                                           | 0.70                          | 0.67                          | 0.68                                                  | 0.46                                                                                           | 0.68          | 0.67                               | 0.68                         | 0.67                                            | 0.70          | 0.70                              | 0.69                         | 0.91                                         |
| Prenatal check bloodsample                                                                                                           | 0.22                          | 0.29                          | 0.26                                                  | 0.44                                                                                           | 0.21                          | 0.24                          | 0.23                                                  | 0.58                                                                                           | 0.26          | 0.24                               | 0.29                         | 0.79                                            | 0.21          | 0.21                              | 0.22                         | 0.27                                         |
| Tetanus injections                                                                                                                   | 0.53                          | 0.58                          | 0.56                                                  | 0.88                                                                                           | 0.62                          | 0.59                          | 0.60                                                  | 0.74                                                                                           | 0.59          | 0.59                               | 0.58                         | 0.93                                            | 0.60          | 0.62                              | 0.53                         | 0.67                                         |
| Received pregnancy information                                                                                                       | 0.29                          | 0.31                          | 0.31                                                  | 0.02                                                                                           | 0.26                          | 0.21                          | 0.23                                                  | 0.71                                                                                           | 0.03          | 0.21                               | 0.31                         | 0.24                                            | 0.10          | 0.26                              | 0.29                         | 0.01                                         |
| Number antenatal visits                                                                                                              | 0.49                          | 0.11                          | 0.31                                                  | 0.91                                                                                           | 0.13                          | 0.12                          | 0.12                                                  | 0.72                                                                                           | 0.11          | 0.12                               | 0.11                         | 0.63                                            | 0.23          | 0.13                              | 0.49                         | 0.75                                         |
| <b>Postnatal care</b>                                                                                                                |                               |                               |                                                       |                                                                                                |                               |                               |                                                       |                                                                                                |               |                                    |                              |                                                 |               |                                   |                              |                                              |
| Received postnatal checkup                                                                                                           | 0.70                          | 0.65                          | 0.66                                                  | 0.49                                                                                           | 0.09                          | 0.02                          | 0.03                                                  | 0.28                                                                                           | 0.01          | 0.02                               | 0.65                         | 0.00                                            | 0.10          | 0.09                              | 0.70                         | 0.00                                         |
| Visited health facilities last 12 months                                                                                             | 0.37                          | 0.38                          | 0.37                                                  | 0.93                                                                                           | 0.25                          | 0.30                          | 0.28                                                  | 0.37                                                                                           | 0.33          | 0.30                               | 0.38                         | 0.71                                            | 0.29          | 0.25                              | 0.37                         | 0.83                                         |
| Assistance during delivery                                                                                                           | 0.40                          | 0.49                          | 0.46                                                  | 0.88                                                                                           | 0.49                          | 0.46                          | 0.47                                                  | 0.88                                                                                           | 0.47          | 0.46                               | 0.49                         | 0.97                                            | 0.46          | 0.49                              | 0.40                         | 0.78                                         |
