# Supplementary material for: Maternal Health Care Services Utilization in the Post-conflict Democratic Republic of Congo: Analysis of Health Inequalities over Time
Source: Preprints.org preprint supplement (doi:10.20944/preprints202308.1768.v1), 2023-08-25
Supplement: Supplementary file 9 [file supplementary]

Archive with 8 entries (8 files):
- Additional file S1 STROBE checklist_Maternal Health Care Services Utilization in the post-conflict DRC.pdf
- Additional file S2 Description of selected variables.pdf
- Additional file S3 Lorenz Curves for all selected.pdf
- Table S1 Descriptive characteristics of all respondents in the DRC by survey year.pdf
- Table S2 Odds ratio by socio-demographic characteristics-Logistic regression.pdf
- Table S3 Relative Risk Ratio on categorical variables - Multinomial regressions.pdf
- Table S4 Gini coefficients for all selected maternal health variables.pdf
- Table S5 Concentration indices by maternal health variables and by survey year 2007 and 2013-2014.pdf
